# Supplementary material
Source: PubMed Central journal article supplement (PMC6761533)

**Supplementary material:**

Table S1. The sizes of the biofilm populations (CFU/ml) of WT PAO1 and  $\Delta katA$  (*katA*) colony biofilm in the two lineages (lineage -1 and -2) evolved under exposure to 0.1mg/L CIP in (A) anaerobic conditions with 1 mM KNO<sub>3</sub> and (B) aerobic conditions. ND not determined

(A)

| Passage number | Pao1-1 Cip Anaerobic | Pao1-2 Cip Anaerobic | katA-1 Cip Anaerobic | katA-2 Cip Anaerobic |
|----------------|----------------------|----------------------|----------------------|----------------------|
| P0             | 3,35E+07             | ND                   | 2,21E+07             | ND                   |
| P1             | 2,55E+04             | 1,08E+03             | 9,50E+02             | 2,07E+04             |
| P2             | 4,59E+05             | 9,80E+03             | 2,42E+05             | 6,38E+03             |
| P3             | 2,67E+05             | 5,22E+04             | 7,80E+04             | 2,02E+05             |
| P4             | 2,90E+05             | 8,00E+02             | 2,70E+03             | 5,10E+03             |
| P5             | 1,21E+06             | 1,02E+05             | 5,02E+05             | 6,00E+05             |
| P6             | 5,16E+06             | 2,29E+06             | 1,36E+06             | 9,93E+05             |

(B)

| Passage number | Pao1-1 Cip Aerobic | Pao1-2 Cip Aerobic | KatA-1 Cip Aerobic | KatA-2 Cip Aerobic |
|----------------|--------------------|--------------------|--------------------|--------------------|
| P0             | 3,36E+08           | ND                 | 3,00E+08           | ND                 |
| P1             | 4,18E+09           | 2,75E+09           | 1,42E+09           | 2,61E+09           |
| P2             | 1,24E+10           | 9,40E+07           | 6,25E+07           | 5,39E+09           |
| P3             | 4,41E+09           | 3,90E+07           | 1,77E+09           | 1,76E+09           |
| P4             | 7,60E+09           | 1,68E+08           | 1,38E+09           | 5,90E+09           |
| P5             | 4,73E+09           | 1,53E+09           | 1,83E+08           | 8,30E+09           |
| P6             | 5,41E+09           | 1,03E+08           | 1,45E+08           | 5,70E+09           |

Table S2. The frequency of the different types of mutations presented as % of total number of mutations in the evolved populations of WT PAO1 and  $\Delta katA$  *P. aeruginosa* (KatA). CIP: evolved with 0.1 mg/L ciprofloxacin, CTRL: control, BIO: biofilm, PLA: planktonic

|               | Transition |         | Transversion |         |         |         |
|---------------|------------|---------|--------------|---------|---------|---------|
|               | A:T-G:C    | G:C-A:T | G:C-T:A      | G:C-C:G | A:T-T:A | A:T-C:G |
| PAO1 CTRL BIO | 19%        | 5%      | 5%           | 14%     | 19%     | 7%      |
| PAO1 CTRL PLA | 12%        | 5%      | 7%           | 13%     | 16%     | 4%      |
| PAO1 CIP BIO  | 9%         | 8%      | 7%           | 16%     | 13%     | 12%     |
| PAO1 CIP PLA  | 18%        | 15%     | 6%           | 19%     | 16%     | 8%      |
| KatA CTRL BIO | 6%         | 3%      | 5%           | 14%     | 10%     | 41%     |
| KatA CTRL PLA | 8%         | 6%      | 7%           | 18%     | 12%     | 30%     |
| KatA CIP BIO  | 15%        | 7%      | 6%           | 13%     | 11%     | 25%     |
| KatA CIP PLA  | 7%         | 3%      | 8%           | 17%     | 11%     | 33%     |

Table S3.

List of genes mutated after evolution of  $\Delta katA$  *P. aeruginosa* in the absence (CTRL) or presence (CIP) of ciprofloxacin (0.1 mg/L) for seven passages in four CIP biofilm lineages (AI; DI; BII and DII), three CIP planktonic (PLA) lineages (A;B;C), four CTRL biofilm lineages (A;B;C;D) and four CTRL planktonic (PLA) lineages (A;B;C;D). The frequency of mutation, the sequence coverage/mutation, the change in the coding region, the amino acid changes and the names and functions of the respective genes are presented.

Figure S1. The development of CIP resistance in  $\Delta katA$  (*katA*) and WT PAO1 biofilm (biofilm) and planktonic (PLA) populations recovered from 1 mg/L CIP during passages (P0 to P6). Under exposure to ciprofloxacin,  $\Delta katA$  CIP-biofilm populations developed a significantly higher resistant subpopulation compared to WT PAO1 CIP-biofilm populations at P3(p= 0.01), P4(p=0.02), P5(p=0.02) and P6(p=0.03). The values represent the mean (SEM) of the replicates in each condition.

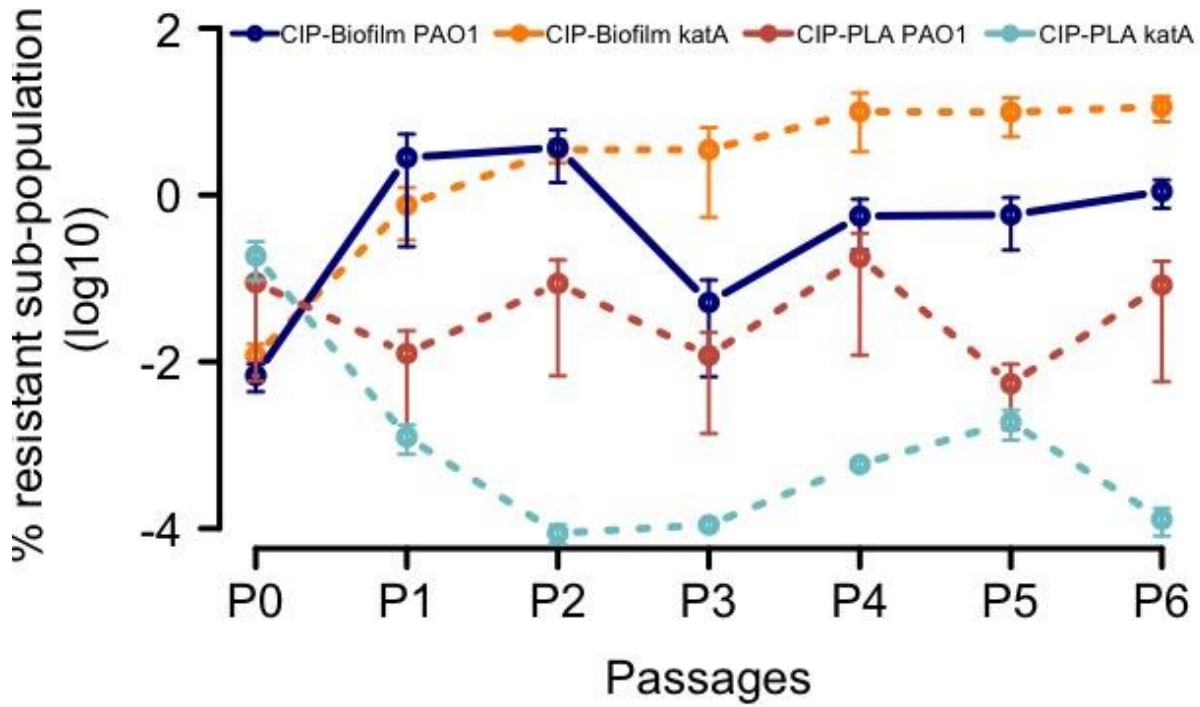

Figure S2. The number of nonsynonymous mutations by gene function category (mean +SEM) documented for  $\Delta katA$  biofilm (BIO) and planktonic (PLA) populations evolved in the absence (CTRL) or presence of CIP (CIP). \* means that the CIP BIO  $\Delta katA$  and CIP PLA  $\Delta katA$  is significantly different from CTRL BIO  $\Delta katA$  and CTRL PLA  $\Delta katA$ , respectively.

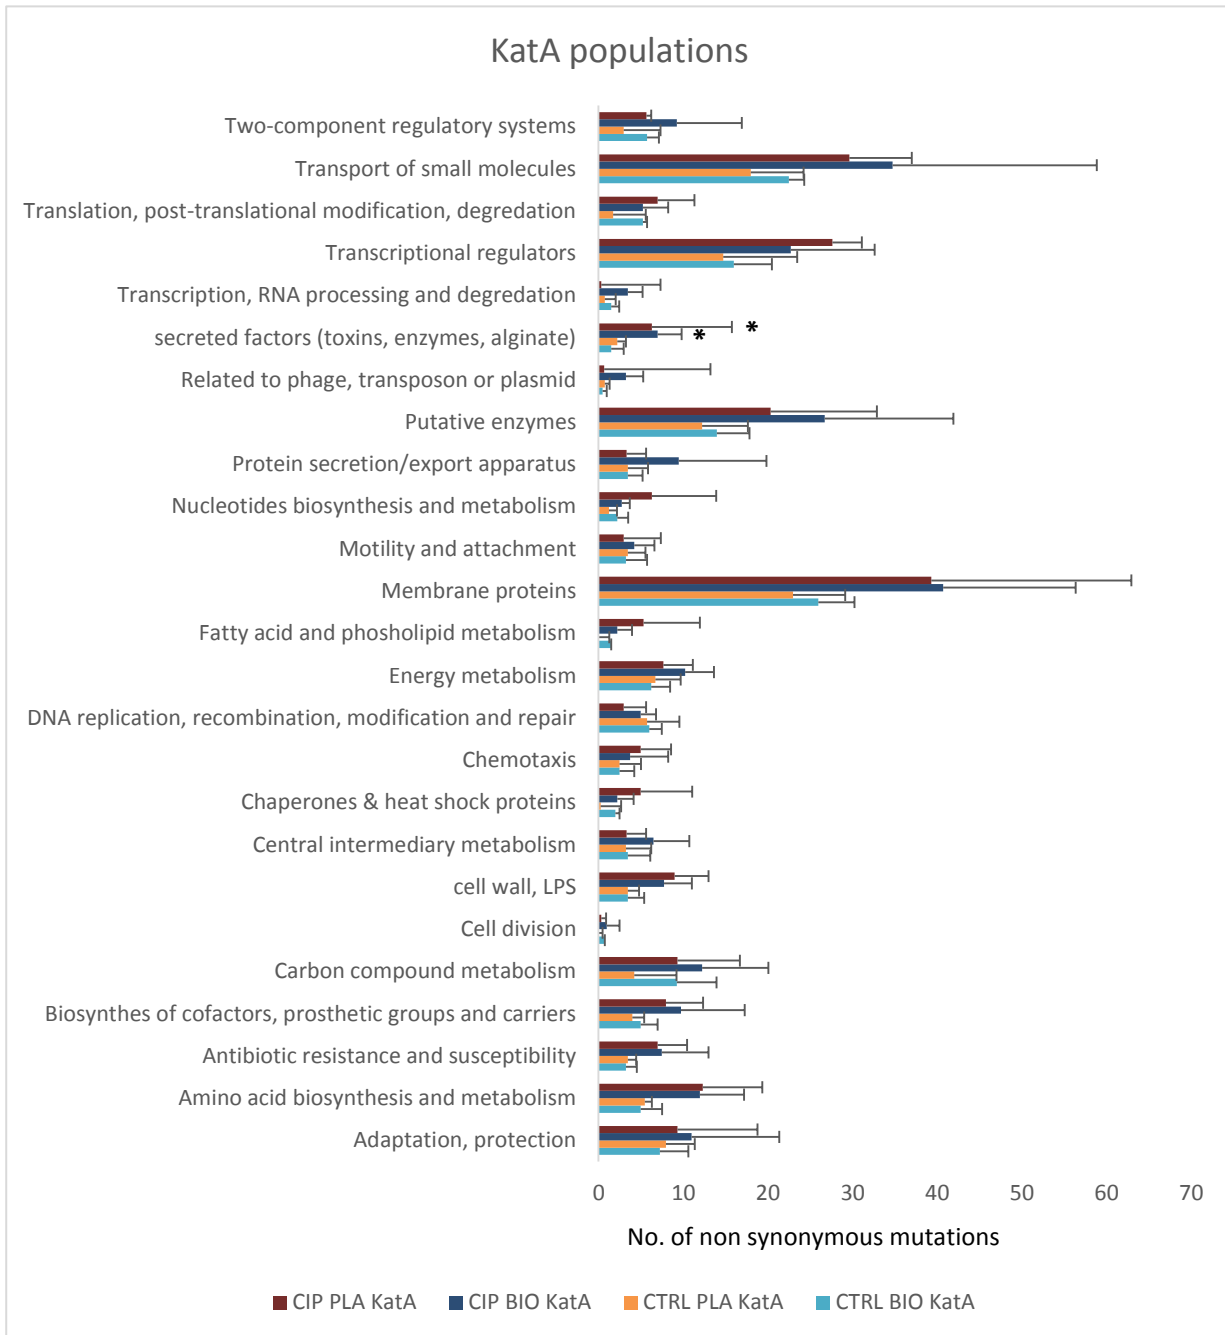

Figure S3. Large insertion in *mutL*, replacement in *mexT* and deletion in *mexR*, respectively in lineages AI and DI of CIP-evolved  $\Delta katA$  biofilm and in lineages A and C of CIP evolved  $\Delta katA$  planktonic culture.

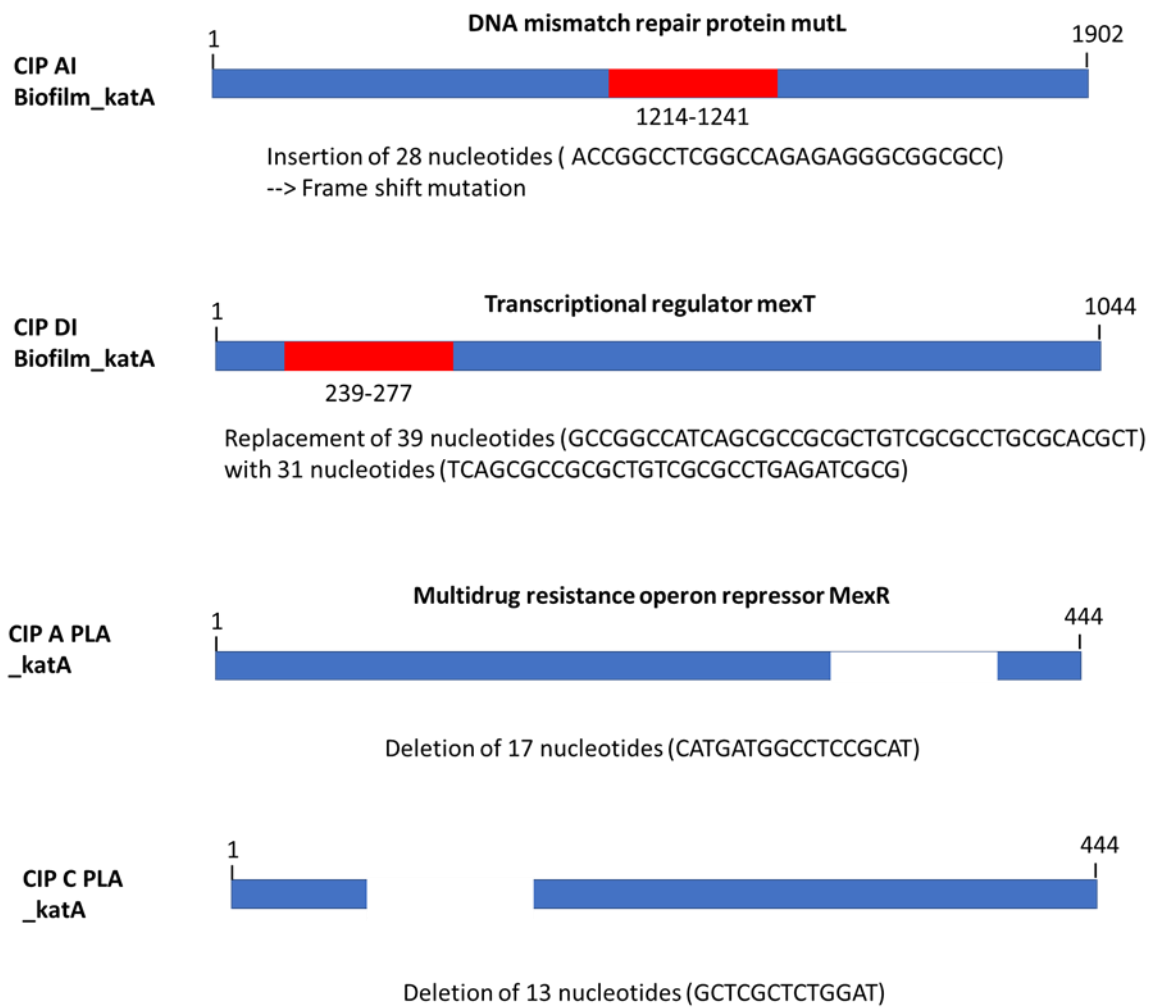

Supplement: AAC.00766-19-s0001.pdf [file AAC.00766-19-s0001.pdf]
